# Supplementary material
Source: PubMed Central journal article supplement (PMC9746322)
Supplement: aem.01581-22-s0001.pdf [file aem.01581-22-s0001.pdf]

# SUPPORTING INFORMATION FOR

## The maize pathogen *Ustilago maydis* secretes glycoside hydrolases and carbohydrate oxidases directed towards components of the fungal cell wall

Jean-Lou Reyre<sup>1,2</sup>, Sacha Grisel<sup>1,3</sup>, Mireille Haon<sup>1,3</sup>, David Navarro<sup>1,4</sup>, David Ropartz<sup>5-6</sup>, Sophie Le Gall<sup>5-6</sup>, Eric Record<sup>1</sup>, Giuliano Sciarra<sup>1</sup>, Olivier Tranquet<sup>1</sup>, Jean-Guy Berrin<sup>1,3\*</sup> and Bastien Bissaro<sup>1\*</sup>

<sup>1</sup> INRAE, Aix Marseille University, UMR1163 Biodiversité et Biotechnologie Fongiques, F-13009, Marseille, France

<sup>2</sup> IFP Energies nouvelles, 1 et 4 avenue de Bois-Préau, F-92852 Reuil-Malmaison, France

<sup>3</sup>INRAE, Aix Marseille University, 3PE platform, F-13009, Marseille, France

<sup>4</sup>INRAE, Aix Marseille University, CIRM-CF, F-13009, Marseille, France

<sup>5</sup>INRAE, UR1268 BIA, F-44300, Nantes, France

<sup>6</sup>INRAE, PROBE research infrastructure, BIBS facility, F-44300, Nantes, France

\*corresponding authors:

Jean-Guy Berrin (jean-guy.berrin@inrae.fr)

Bastien Bissaro (bastien.bissaro@inrae.fr)

### This file includes:

1. Supplementary Figure 1 to 21 and Supplementary table 1 to 2
2. Full abbreviations list
3. Supplementary references list

## 1. Supplementary Figures

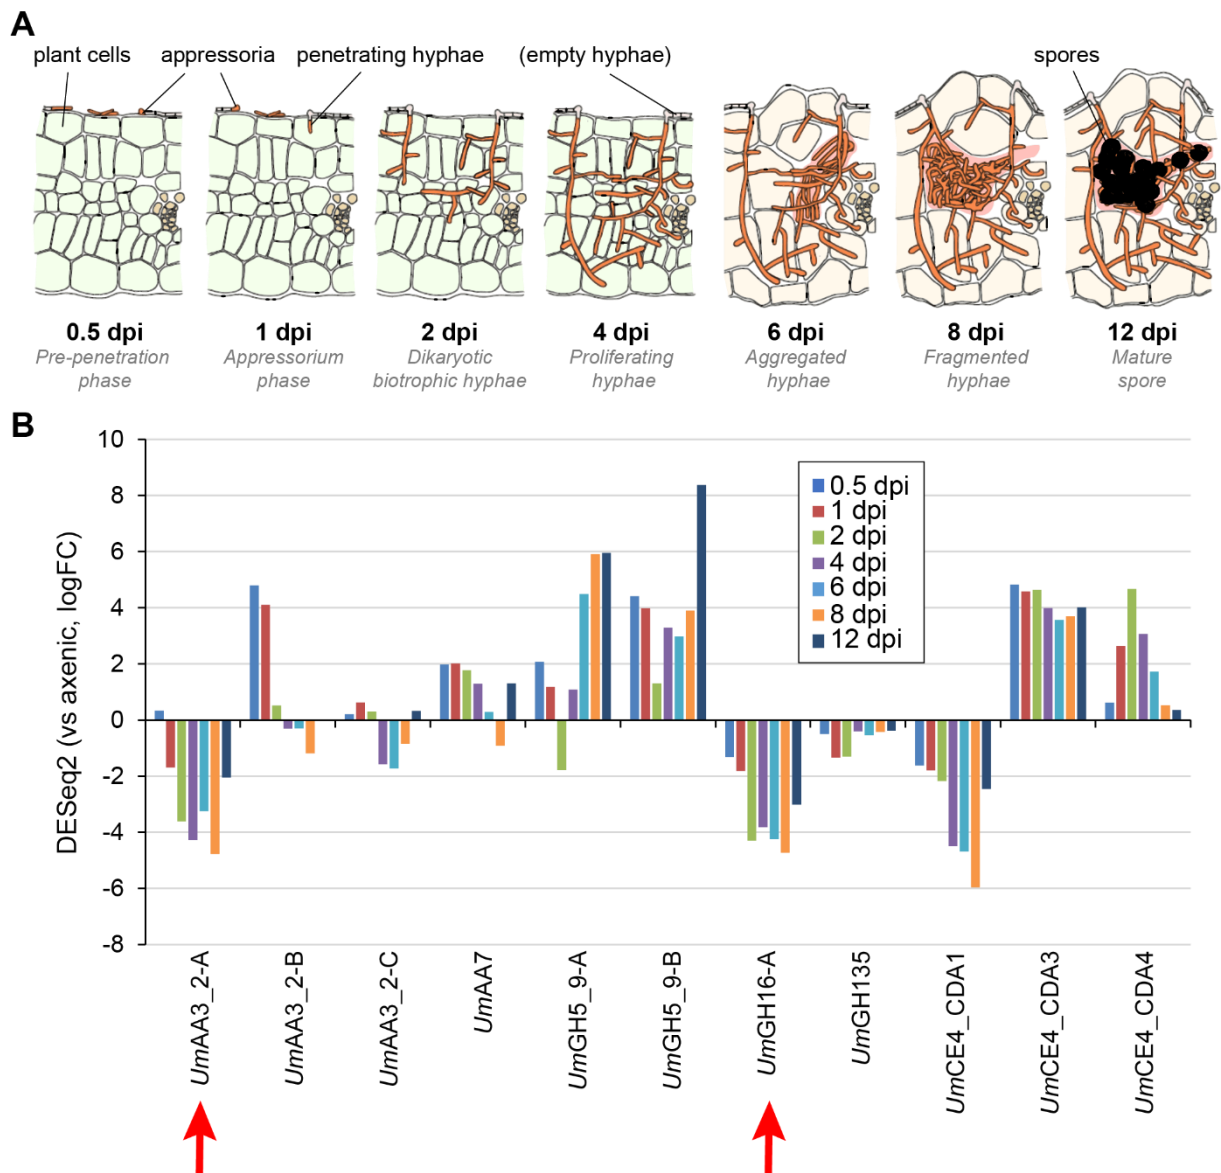

**Fig. S1. Time-course expression along *U. maydis* infection cycle on maize of the 11 genes coding for putative FCW-active CAZymes. (A) Schematic representation of *U. maydis* plant infection cycle (dpi, days post inoculation). (B) Differential gene expression (vs axenic condition). Original transcriptomic data were retrieved from (1) for the following genes (proteins) : UMAG\_03551 (*UmAA3\_2-A*), UMAG\_03256 (*UmAA3\_2-B*), UMAG\_04044 (*UmAA3\_2-C*), UMAG\_10861 (*UmAA7*), UMAG\_05550 (*UmGH5\_9-A*), UMAG\_00235 (*UmGH5\_9-B*), UMAG\_02134 (*UmGH16\_1-A*), UMAG\_06157 (*UmGH135*), UMAG\_00638 (*UmCE4\_CDA1*), UMAG\_11922(*UmCE4\_CDA3*) and UMAG\_01788 (*UmCE4\_CDA4*). Red arrows indicate the two enzymes characterized in the present study.**

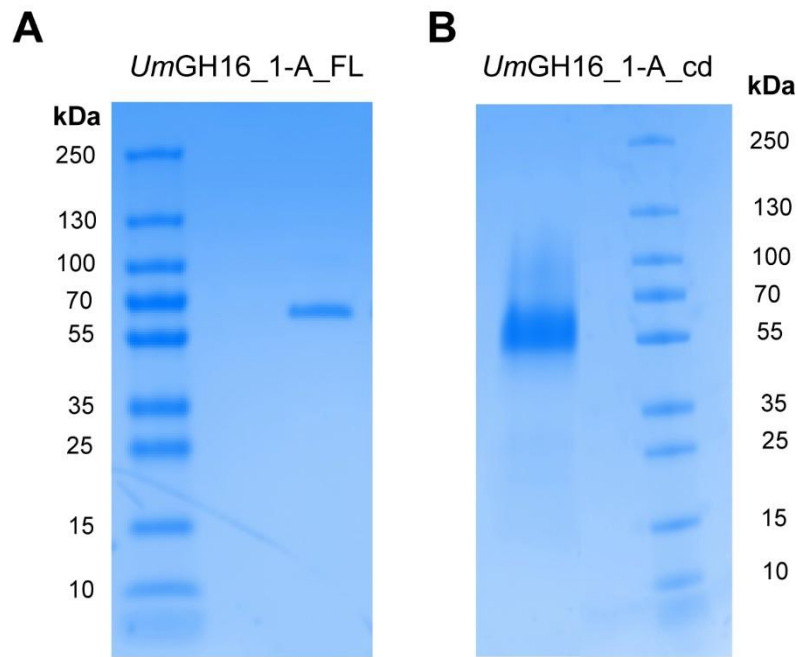

**Fig. S2. SDS-PAGE analysis of *UmGH16\_1-A*, with (A) and without (B) C-term extension.** The enzymes were expressed in *P. pastoris* and purified by IMAC. The theoretical molecular weight of full length (*UmGH16\_1-A\_FL*) and truncated (*UmGH16\_1-A\_cd*) versions of *UmGH16\_1-A* are 39.168 kDa and 33.439 kDa, respectively. Note that the higher molecular weight observed on SDS-PAGE is most likely due to protein *N*-glycosylation (7 putative glycosylation sites, exposed at the protein surface, are predicted by the online tool NetNGlyc – 1.0).

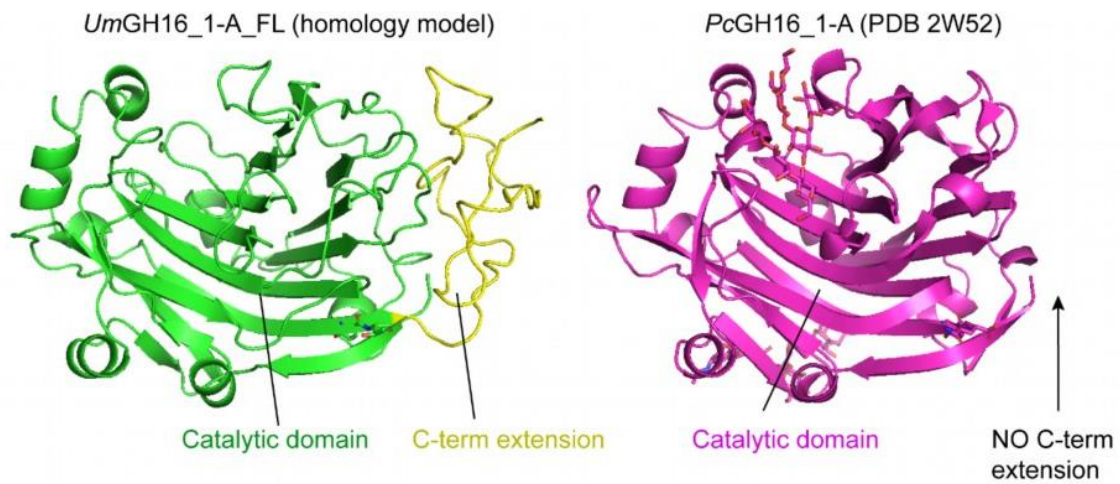

**Fig. S3. Comparison of structures of (A) *UmGH16\_1-A\_FL* (homology model, with AlphaFold) and (B) its closest structural homologue, the GH16\_1-A from *Phanerochaete chrysosporium* (PDB 2W52; (2)).**

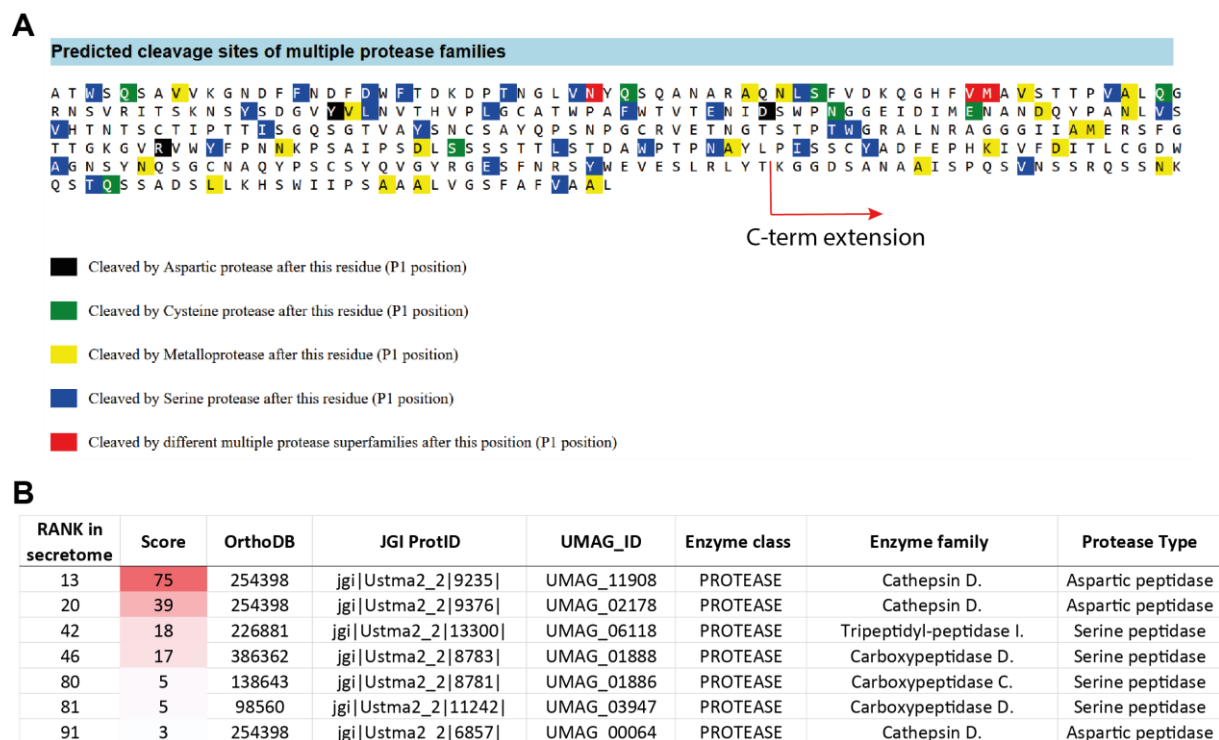

**Fig. S4. (A) Prediction of proteolytic cleavage sites in *UmGH16\_1-A* and (B) proteases found in the TOP100 secreted proteins. Proteolytic cleavage sites were predicted with PROSPER (3).**

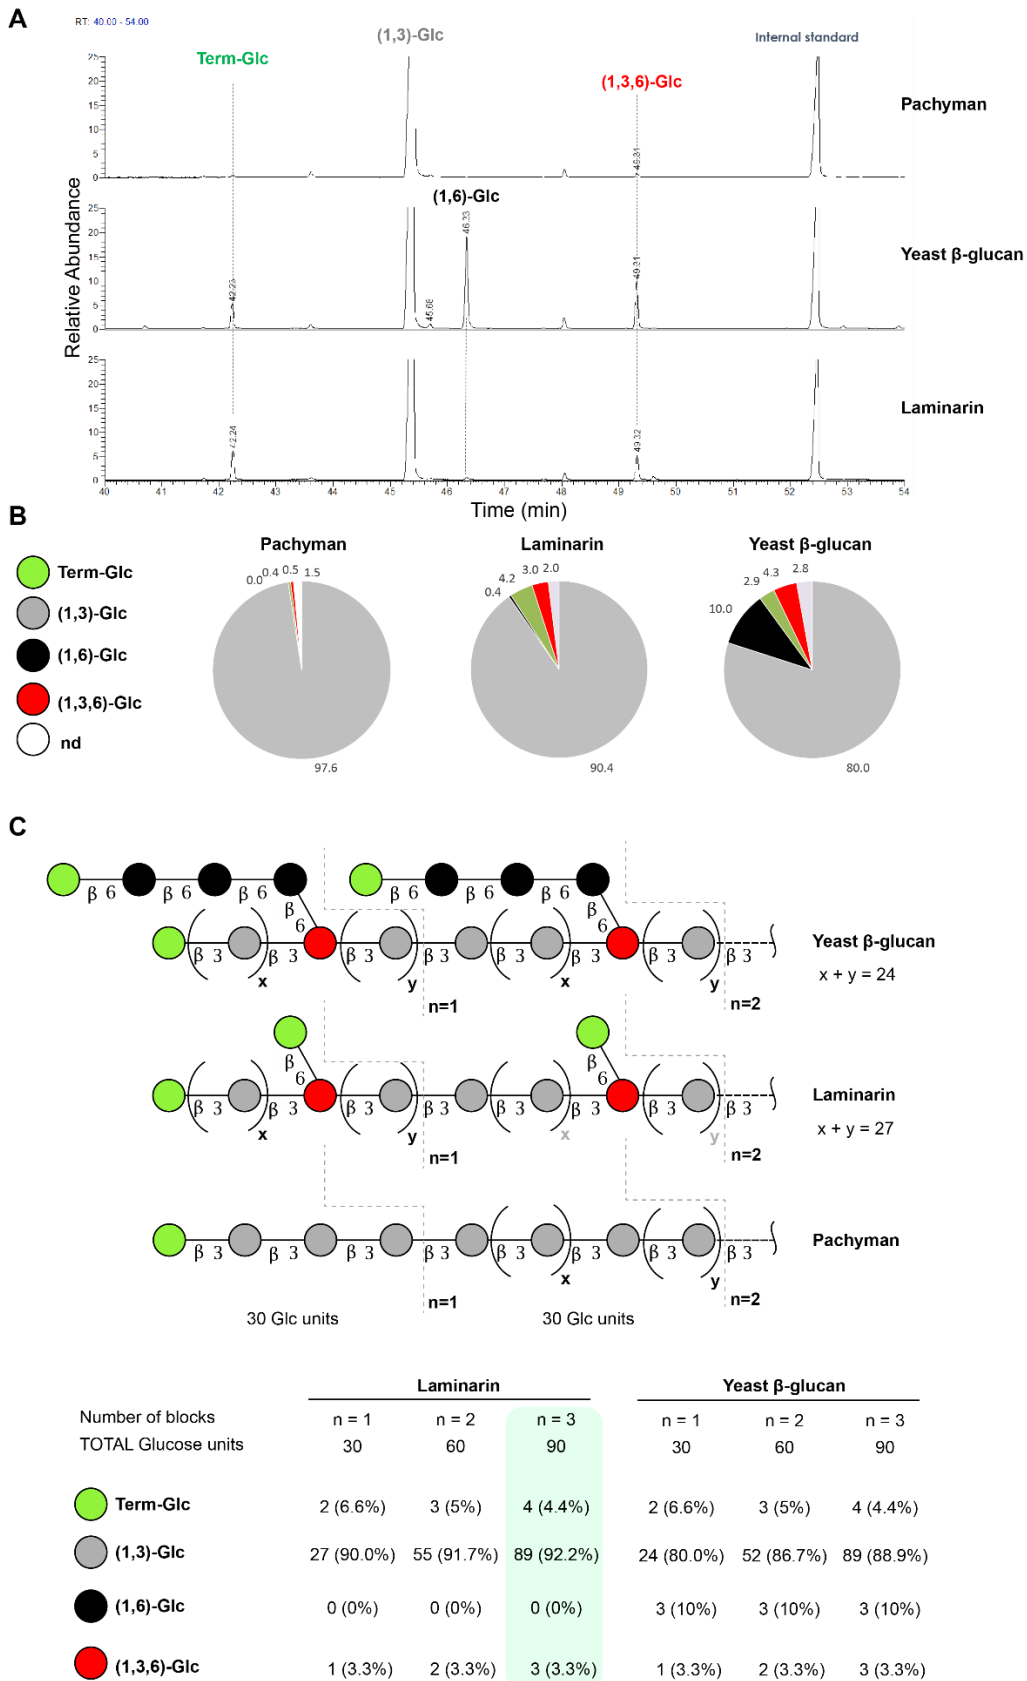

**Fig. S5. Linkage analyses of Laminarin, yeast β-glucan and pachyman. (A)** Total Ion Chromatograms (TIC) of partially methylated alditol acetates by GC-MS, **(B)** quantification and **(C)** reconstitution of sugar linkages.

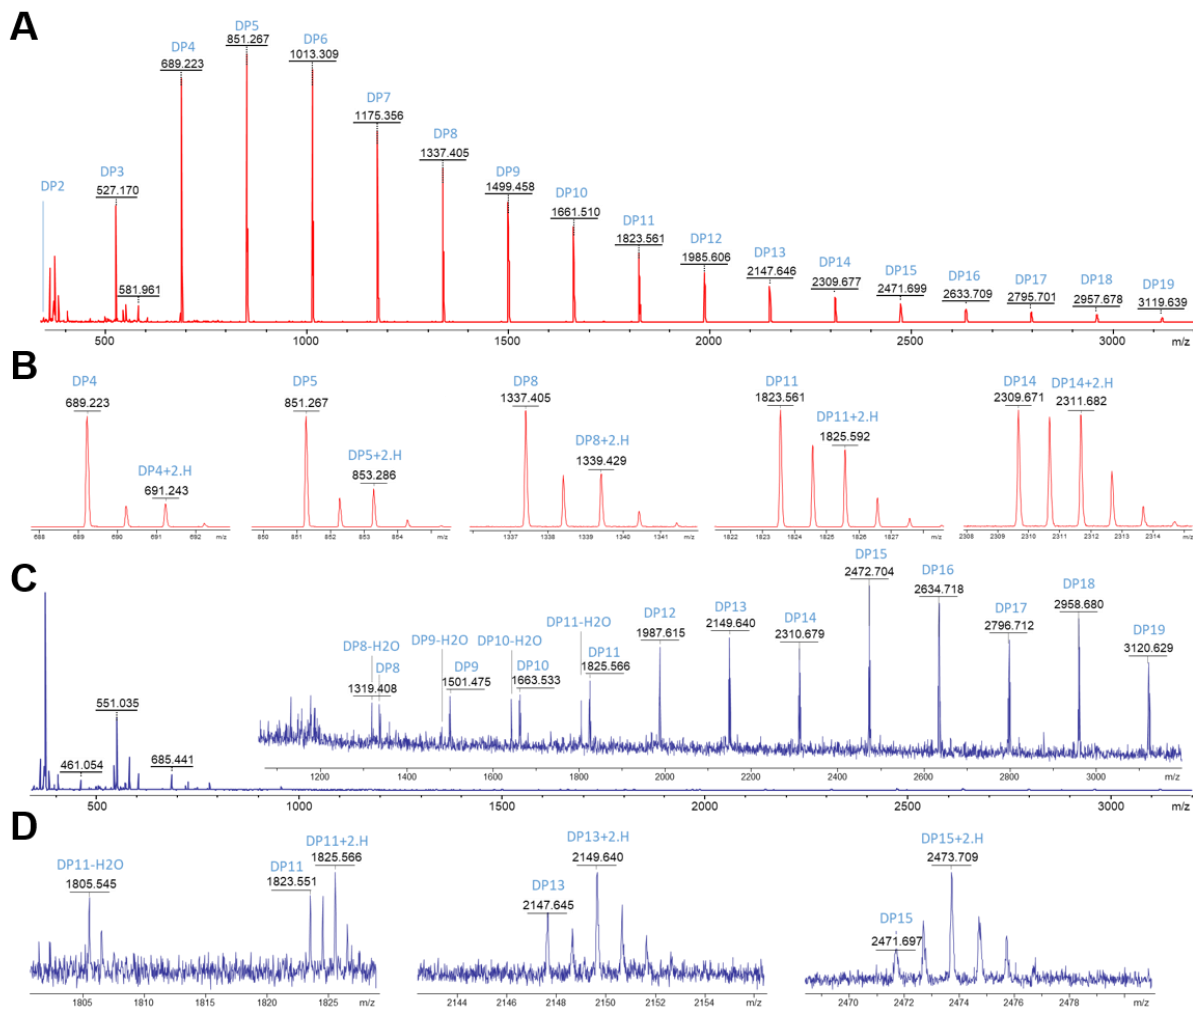

**Fig. S6. MALDI-ToF-MS analyses of soluble products released from Laminarin in the presence (A-B, red) or absence (C-D, blue) of *UmGH16\_1-A\_cd*. Full Spectra are presented in figure A and C. Representative zooms to highlight normal species, reduced species and species with a loss of water are shown figure B and D.**

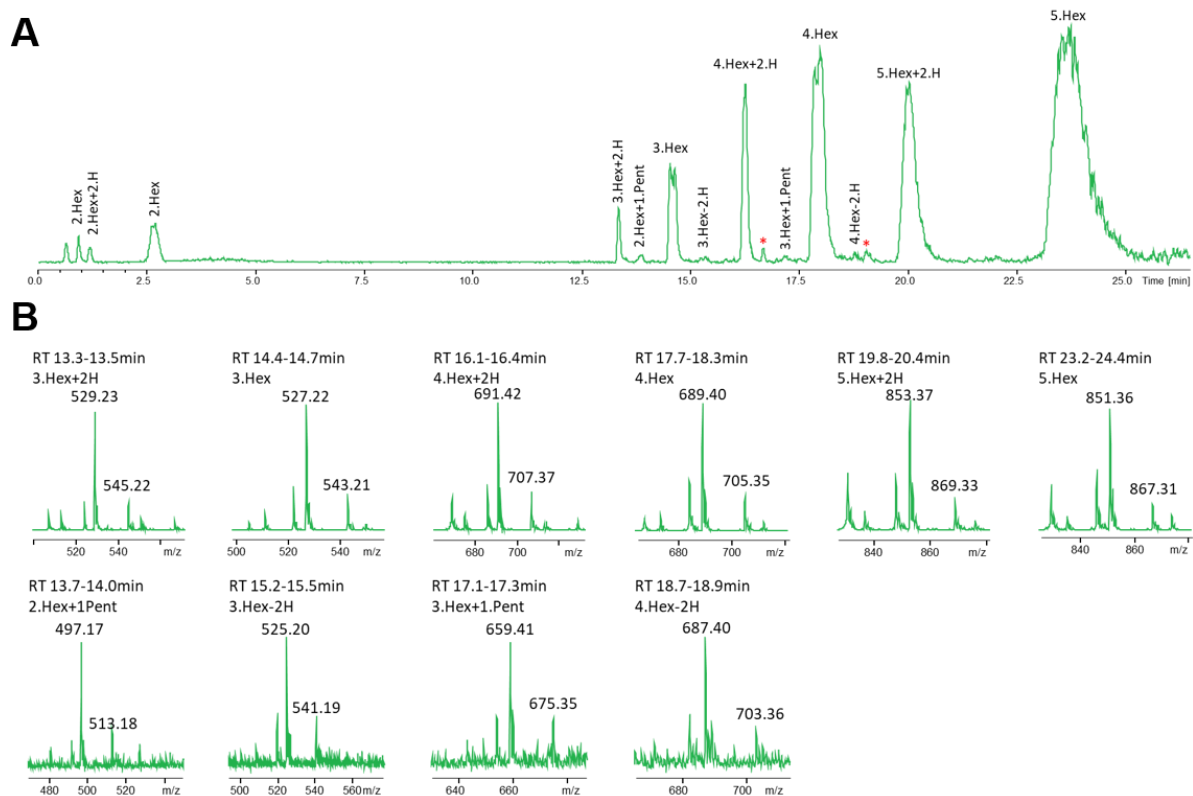

**Fig. S7. UPLC-ESI-IT analyses of soluble products released from Laminarin by *UmGH16\_1-A\_cd*. (A) Base peak chromatography between 0 and 27 min. (red stars indicate a contaminant) and (B) ESI-MS spectra of each compounds revealed by the analysis. RT and nature of the oligosaccharides are indicated for each MS spectrum. For the sake of clarity, only the  $[M+Na]^+$  and the  $[M+K]^+$  ions are labelled with the corresponding  $m/z$  values.**



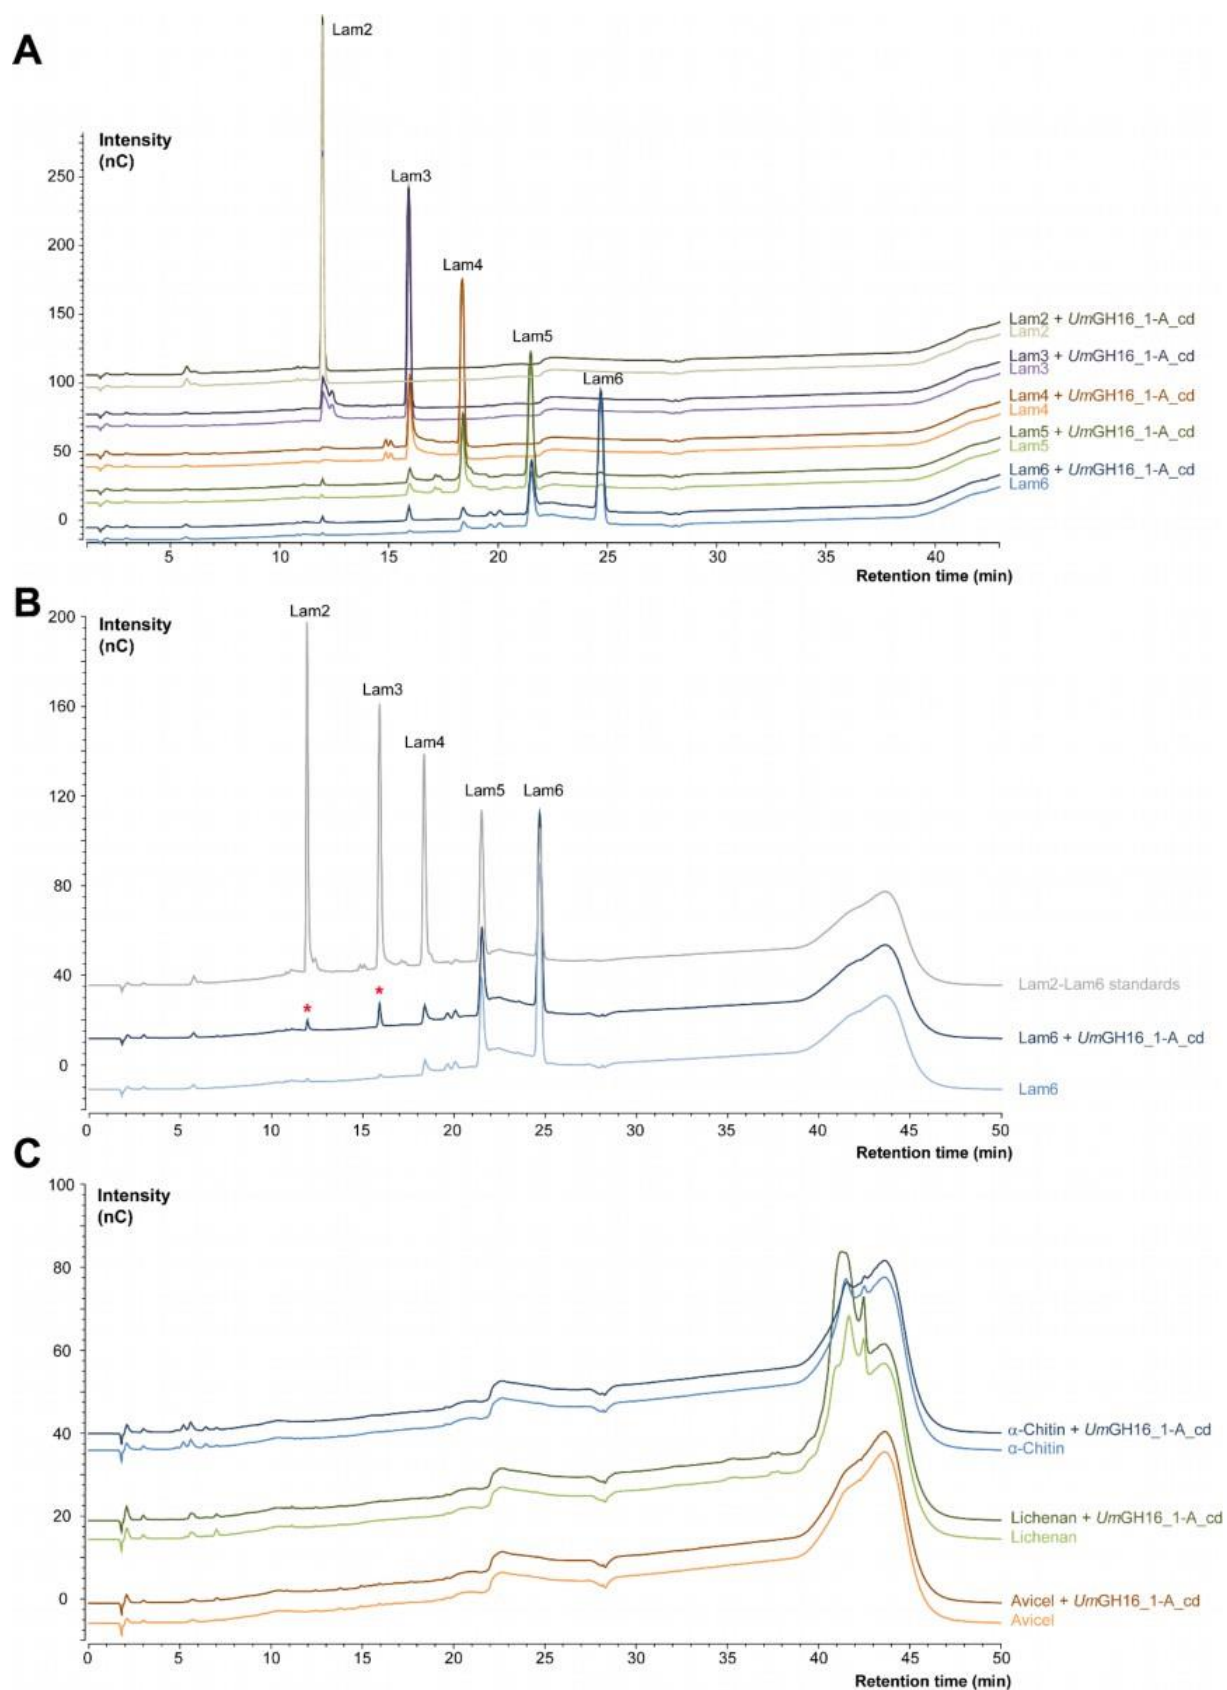

**Fig. S8. Control reactions of *UmGH16\_1-A* on  $\beta$ -1,4 glucans, mixed  $\beta$ -1,3/1,4 glucan and  $\beta$ -1,3 glucooligosaccharides.** The graphs show HPAEC-PAD chromatograms of reaction

products released from **(A-B)** laminari-oligosaccharides (DP2-DP6; 1 mM each) and **(C)** Avicel,  $\alpha$ -chitin or Lichenan (10 mg.mL<sup>-1</sup> final concentration) by *UmGH16\_1-A\_cd* (10 nM). Panel B shows a zoom-in view of chromatograms displayed in panel A for reactions on Lam6 only (Lam2 to Lam 5 were not recognized as substrates by *UmGH16\_1-A\_cd*). On Lam6, very small amounts of products Lam2 and Lam 3 (at 12 and 16 min, red stars) were detected. In panel C, Avicel and  $\alpha$ -chitin are linear polymers of  $\beta$ -1,4-linked D-glucose and *N*-acetylglucosamine units, respectively. Lichenan is a mixed  $\beta$ -1,3/1,4 glucan. All reactions were incubated during 4 h, in citrate phosphate buffer (50 mM, pH 5.5), in a thermomixer (30 °C, 1,000 rpm). All experiments were carried out in triplicate. However, for the sake of clarity, only one replicate is shown.

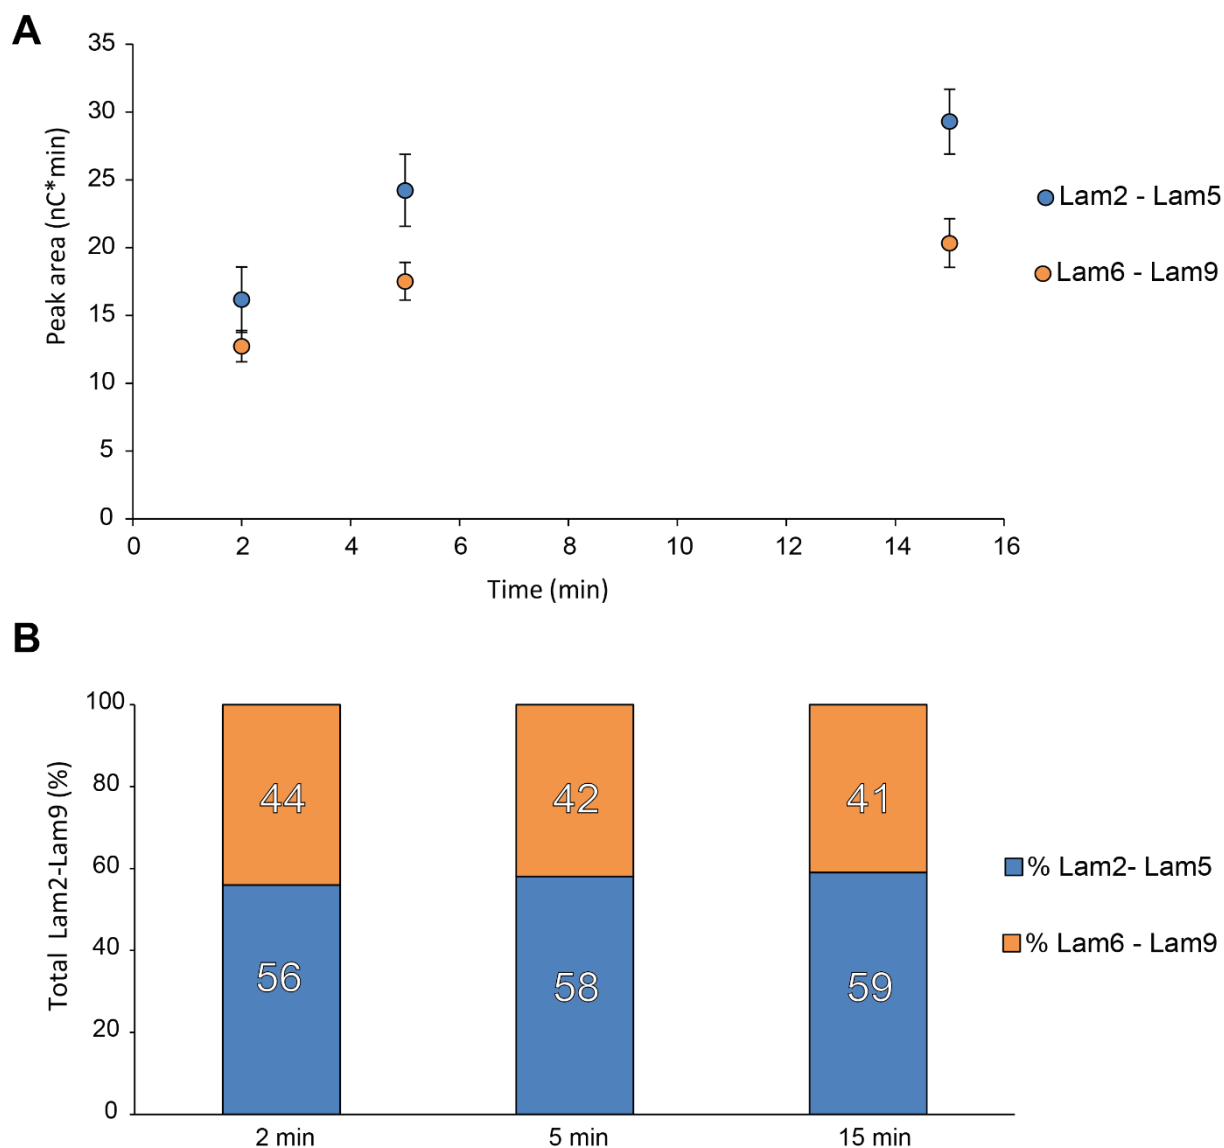

**Fig. S9. Time-course release of short (Lam2-Lam5) and long (Lam6-Lam9) oligosaccharides from Laminarin by *UmGH16\_1-A\_cd*.** The amount of oligosaccharides is expressed as **(A)** the absolute sum of peak areas and **(B)** the proportion of short and long oligosaccharides at each time point (the sum of short and long oligosaccharides is equal to 100% of released oligosaccharides at each time point). The reactions contained laminarin (10 mg.mL<sup>-1</sup>), *UmGH16\_1-A\_cd* (10 nM) in citrate phosphate buffer (50 mM, pH 5.5) and incubated in a thermomixer (30 °C, 1,000 rpm). Data are presented as average values (n = 3, independent biological replicates) and error bars show s.d.

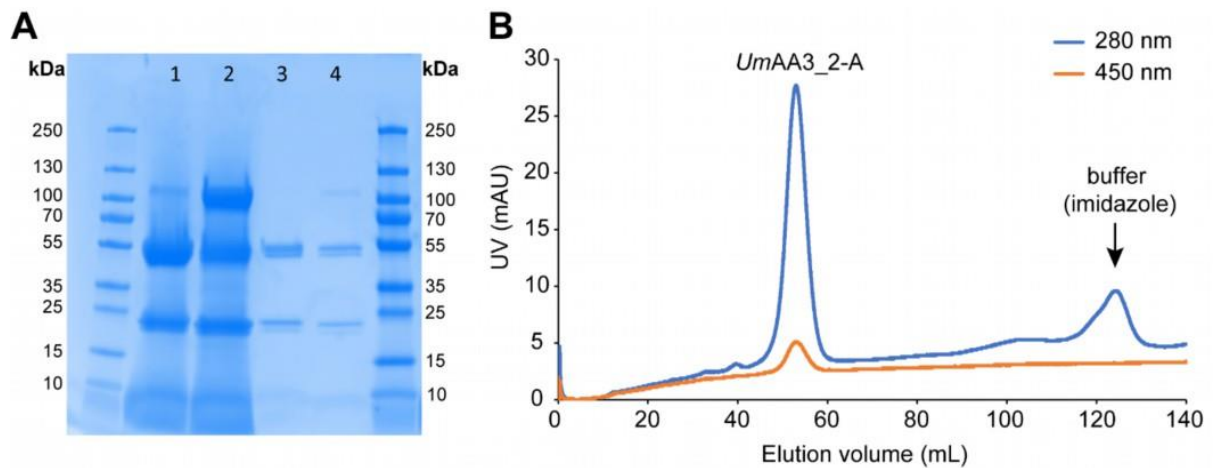

**Fig. S10. Purity and molecular weight analyses of *UmAA3\_2-A*.** (A) SDS-PAGE and (B) SEC analyses. The enzyme was expressed in *P. pastoris* and purified by IMAC followed by SEC. In panel A, the following samples were loaded on the SDS-PAGE gel: lane 1, IMAC-purified *UmAA3\_2-A*; lane 2, heat-treated, IMAC-purified *UmAA3\_2-A*; lane 3, SEC-purified *UmAA3\_2-A*; lane 4, heat-treated, SEC-purified *UmAA3\_2-A*. In panel B, using a calibrated SEC column, we determined an experimental MW of *UmAA3\_2-A* of 48.2 kDa (average of  $n = 2$  independent experiments) (theoretical MW = 64.9 kDa).

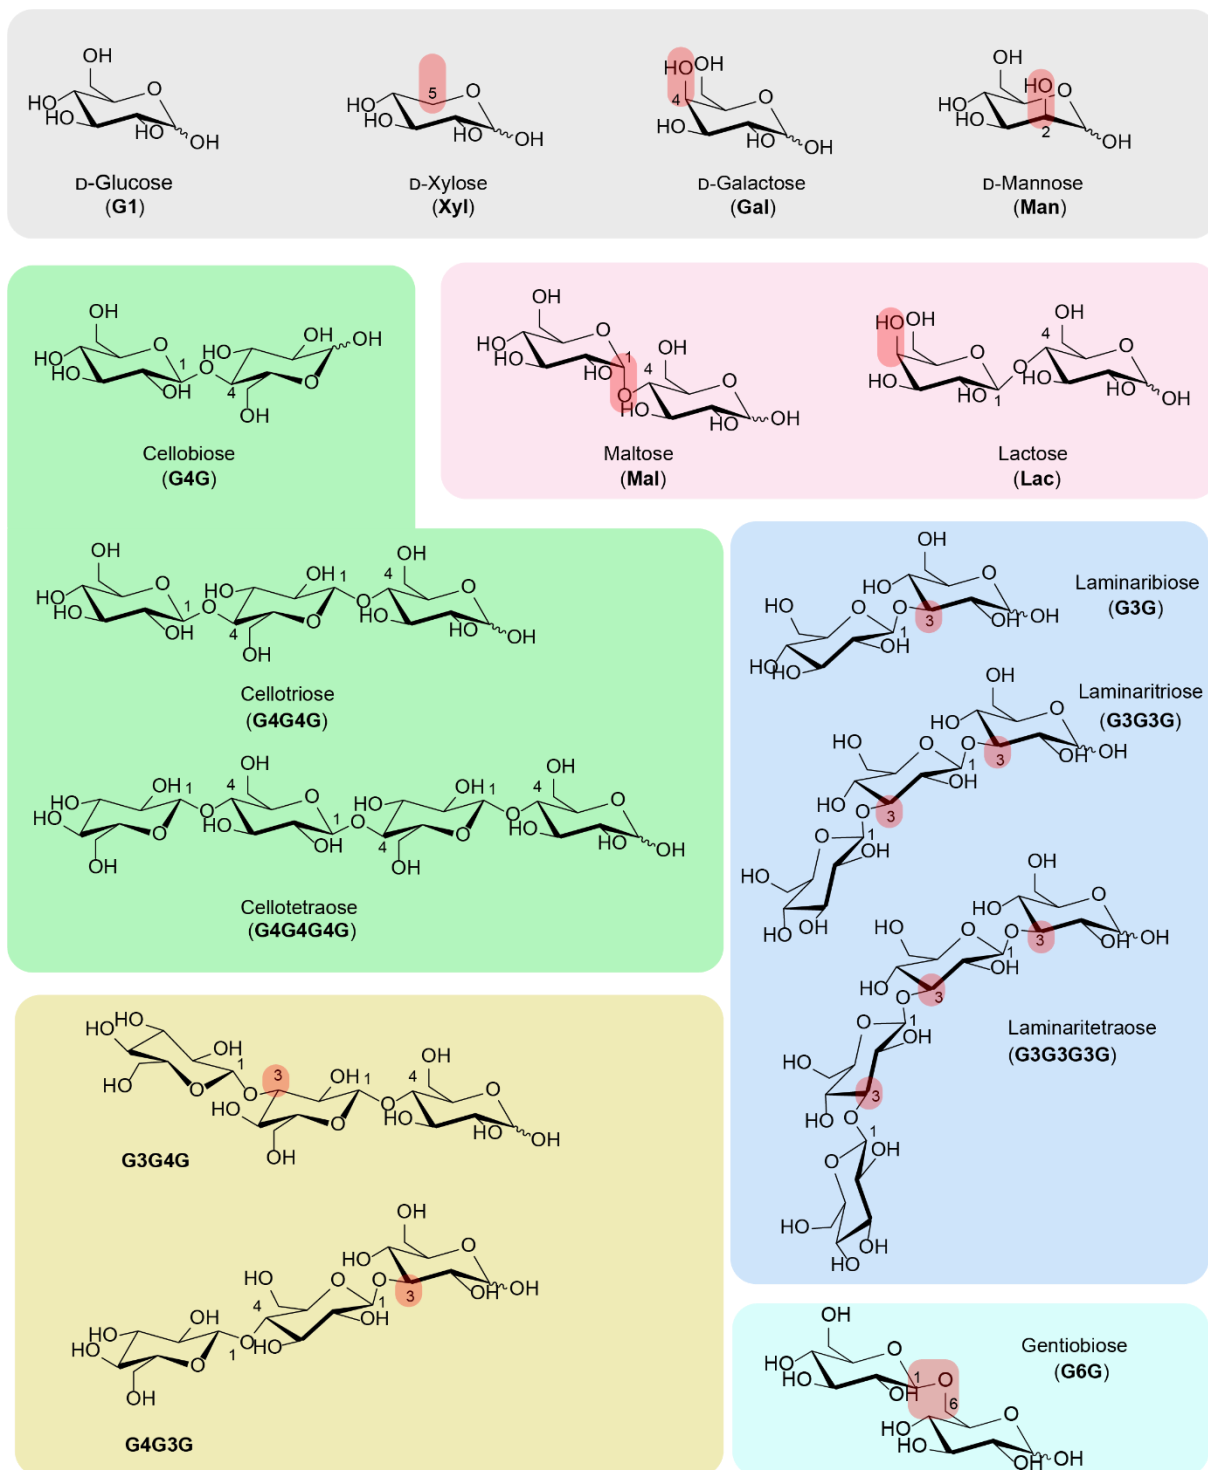

**Fig. S11. Chemical structures of oligosaccharides tested in *UmAA3\_2-A* substrate specificity screening.**

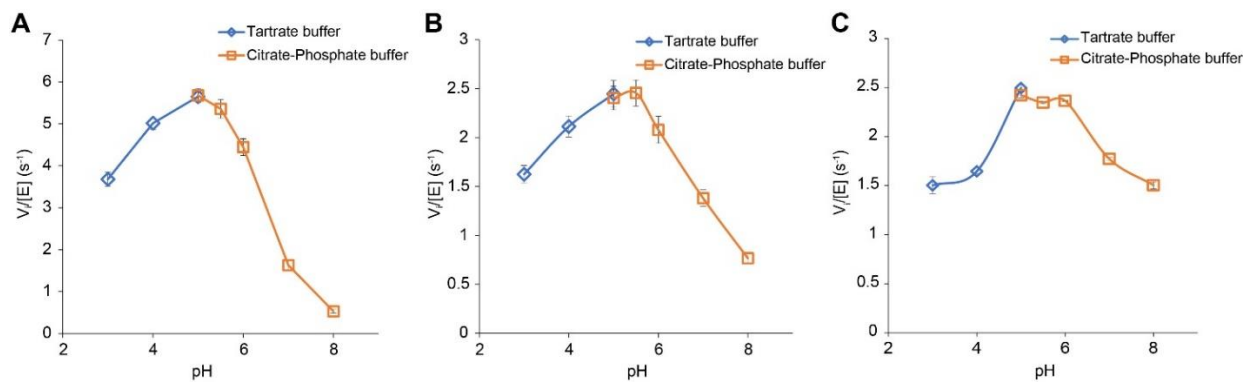

**Fig. S12. pH activity profile of *UmAA3\_2-A* on (A) glucose and (B) G3G and (C) G6G.** The graph shows the reduction rate of DCIP (400  $\mu$ M) by *UmAA3\_2-A* (110 nM), in the presence of glucose (500 mM), G3G (5 mM) or G6G (5 mM) at different pH values (50 mM of tartrate or citrate-phosphate buffer). All reactions were carried out at 30  $^{\circ}$ C. Data points show average values and error bars show s.d. (n = 3 independent biological replicates).

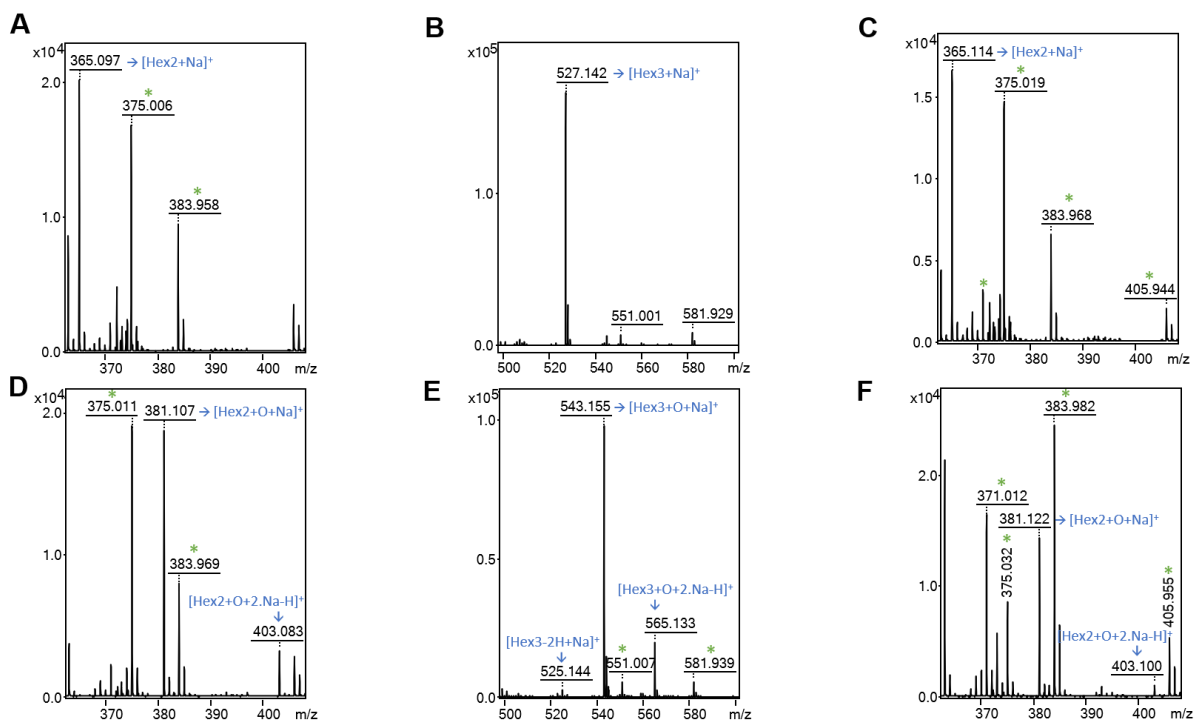

**Fig. S13. MALDI-ToF MS analysis of G3G, G3G3G and G6G oxidation by *UmAA3\_2-A*.**

Spectra of G3G (**A-D**), G3G3G (**B-E**) and G6G (**C-F**) before (**A-C**) and after (**D-F**) treatment by *UmAA3\_2-A*. The spectra show the detection of native oligosaccharides  $[\text{M}+\text{Na}]$  with  $m/z = 365$  (for G3G and G6G) or  $527 \text{ g.mol}^{-1}$  (for G3G3G). Upon addition of *UmAA3\_2-A* oxidized species emerge: simple sodium adducts of oxidized form  $[\text{M}+16+\text{Na}]$  ( $m/z = 381$  for G3G and G6G, or  $543$  for G3G3G) and double sodium adducts of oxidized form  $[\text{M}+16-\text{H}+2\text{Na}]$  ( $m/z = 403$  for G3G and G6G, or  $581$  for G3G3G), which suggest the formation of aldonic acids (see **Fig. S14** for validation).

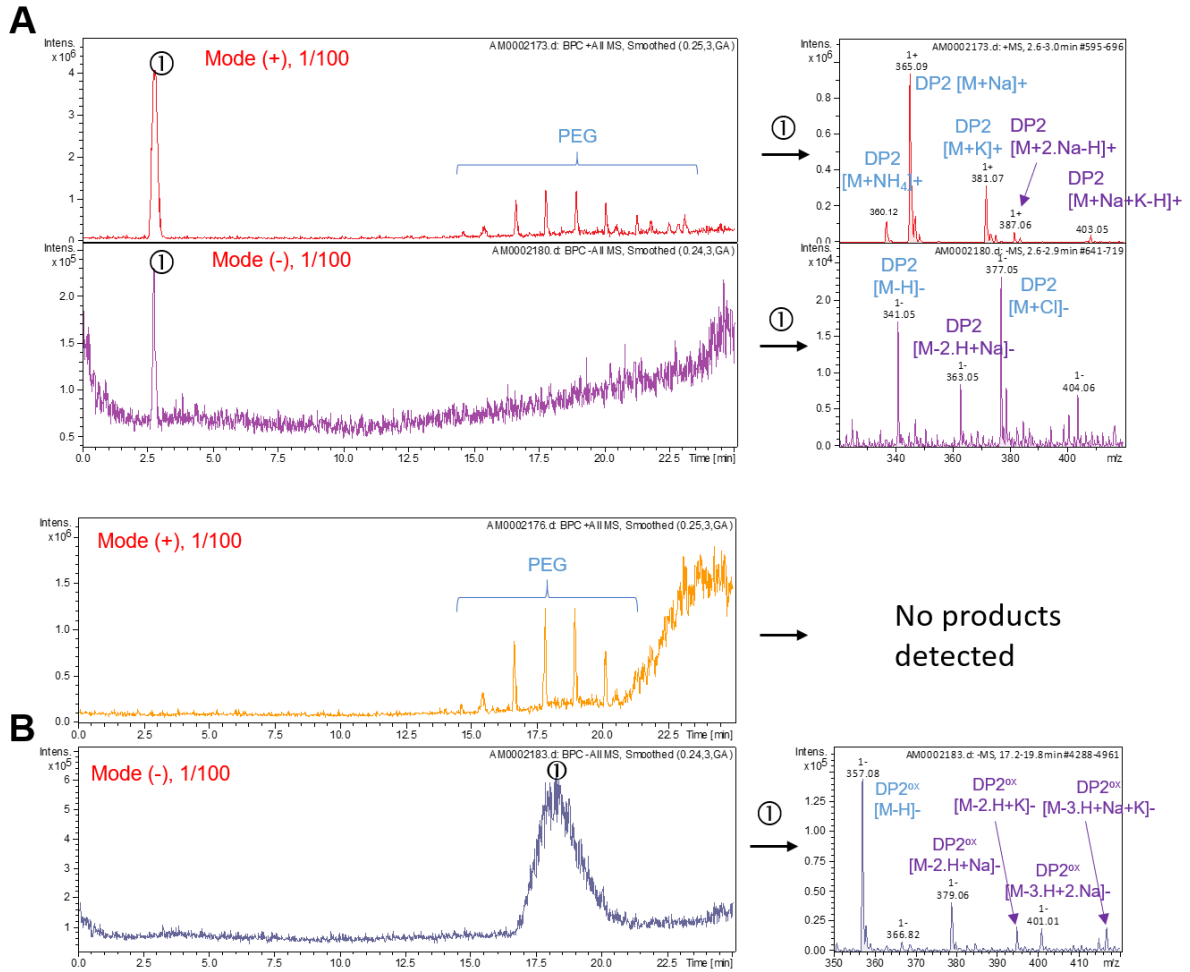

**Fig. S14. UPLC-MS analysis of G3G before (A) and after (B) oxidation by *UmAA3\_2-A*.** Each panel shows the UPLC chromatogram (left) and MS spectra (right) using either positive (upper graph) or negative (lower graph) ionization mode.



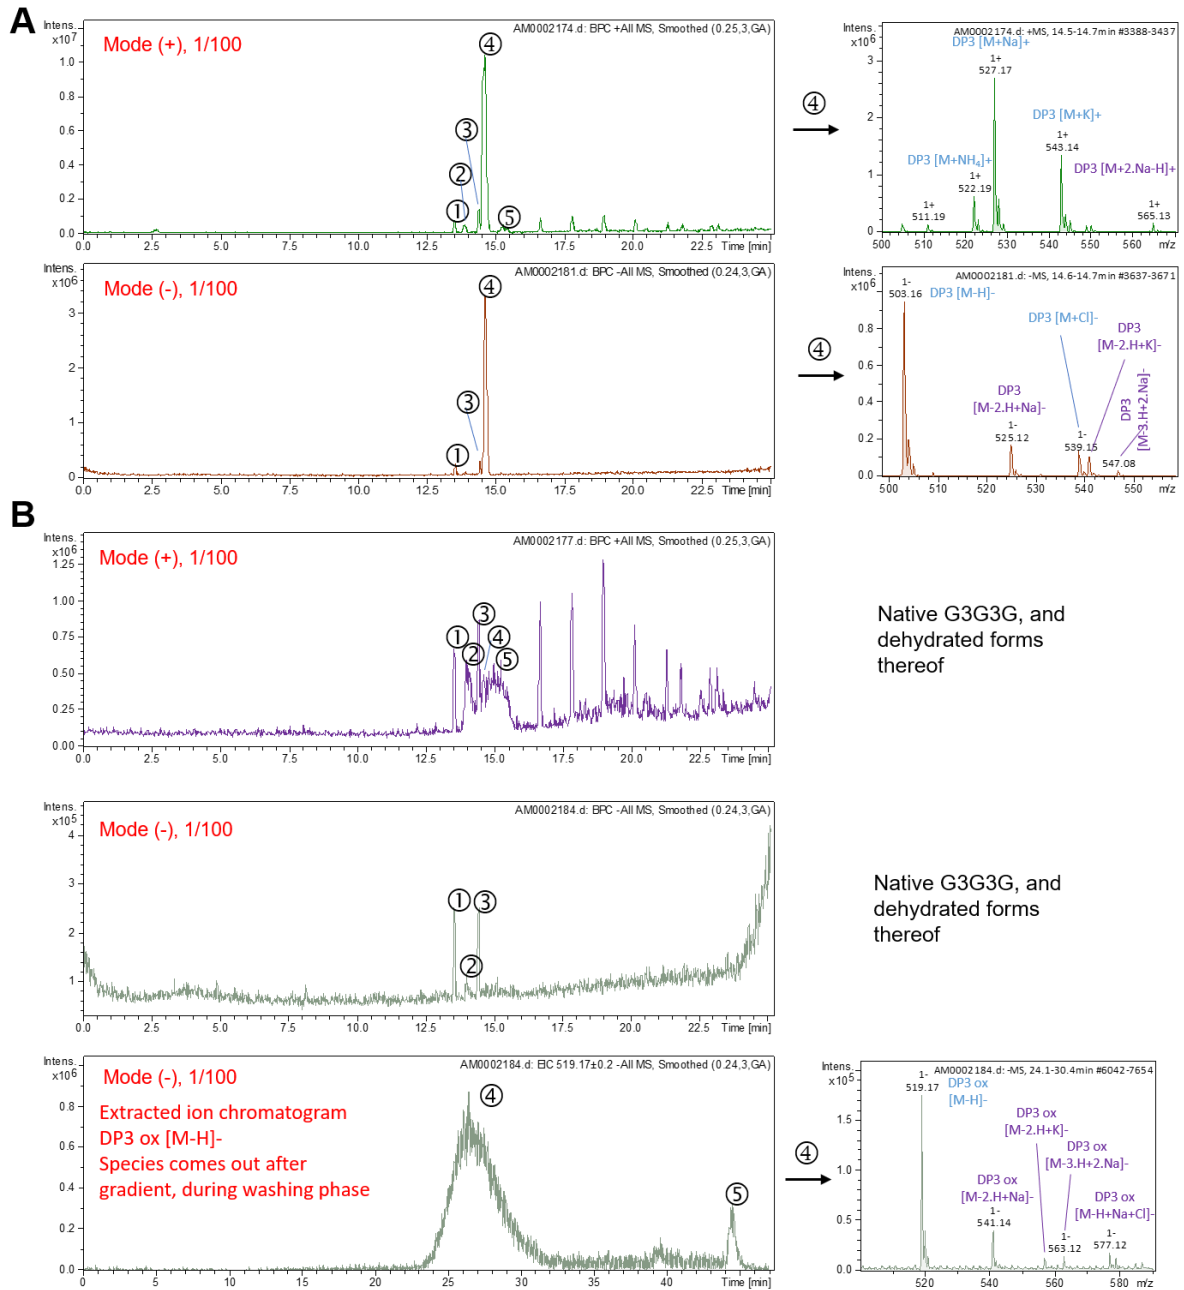

**Fig. S15. UPLC-MS analysis of G3G3G before (A) and after (B) oxidation by *UmAA3\_2*.**  
 A. Each panel shows the UPLC chromatogram (left) and MS spectra (right) using either positive (upper graph) or negative (lower graph) ionization mode.

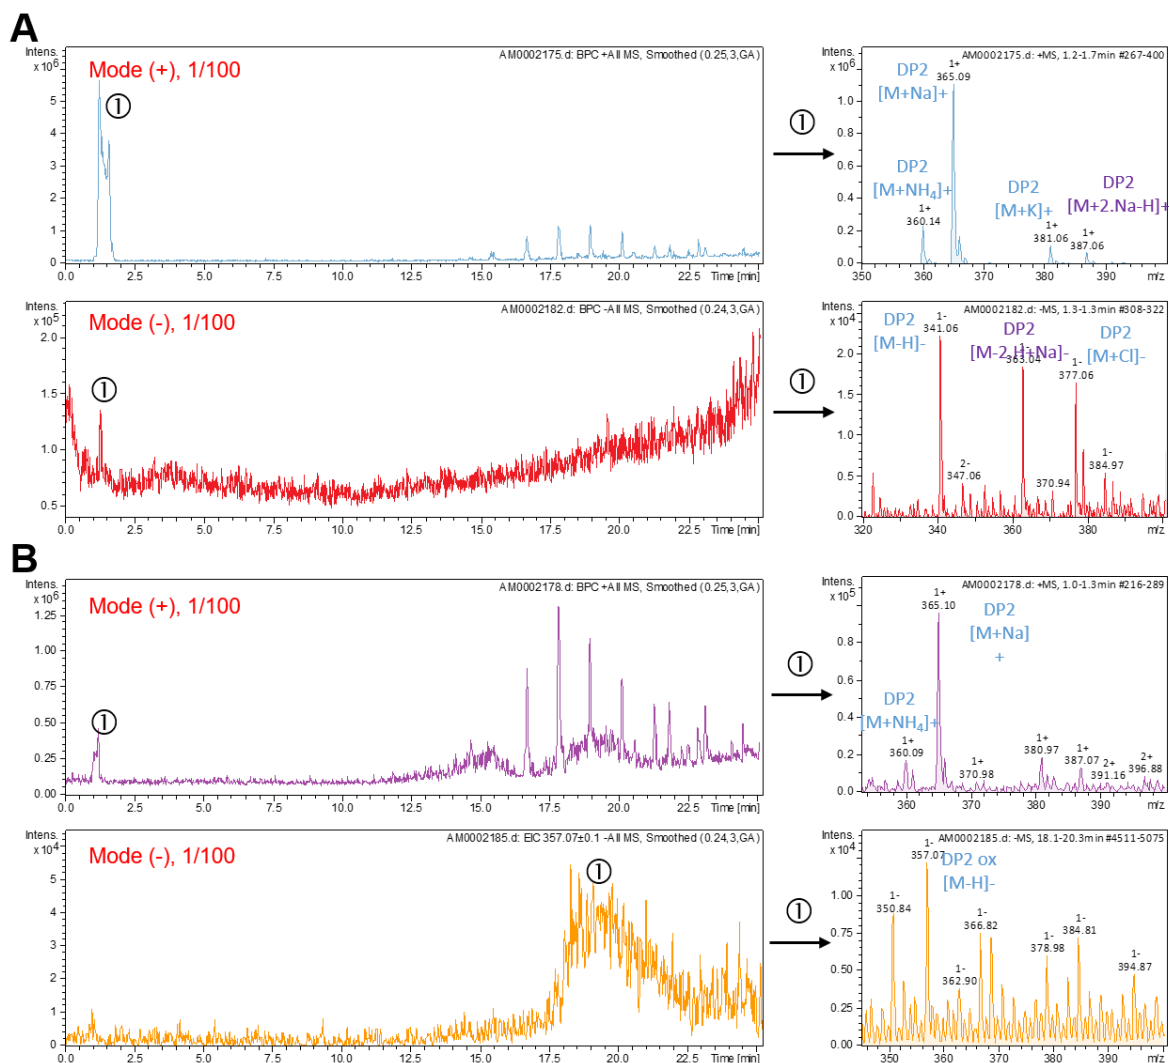

**Fig. S16. UPLC-MS analysis of G6G before (A) and after (B) oxidation by *UmAA3\_2-A*.** Each panel shows the UPLC chromatogram (left) and MS spectra (right) using either positive (upper graph) or negative (lower graph) ionization mode.

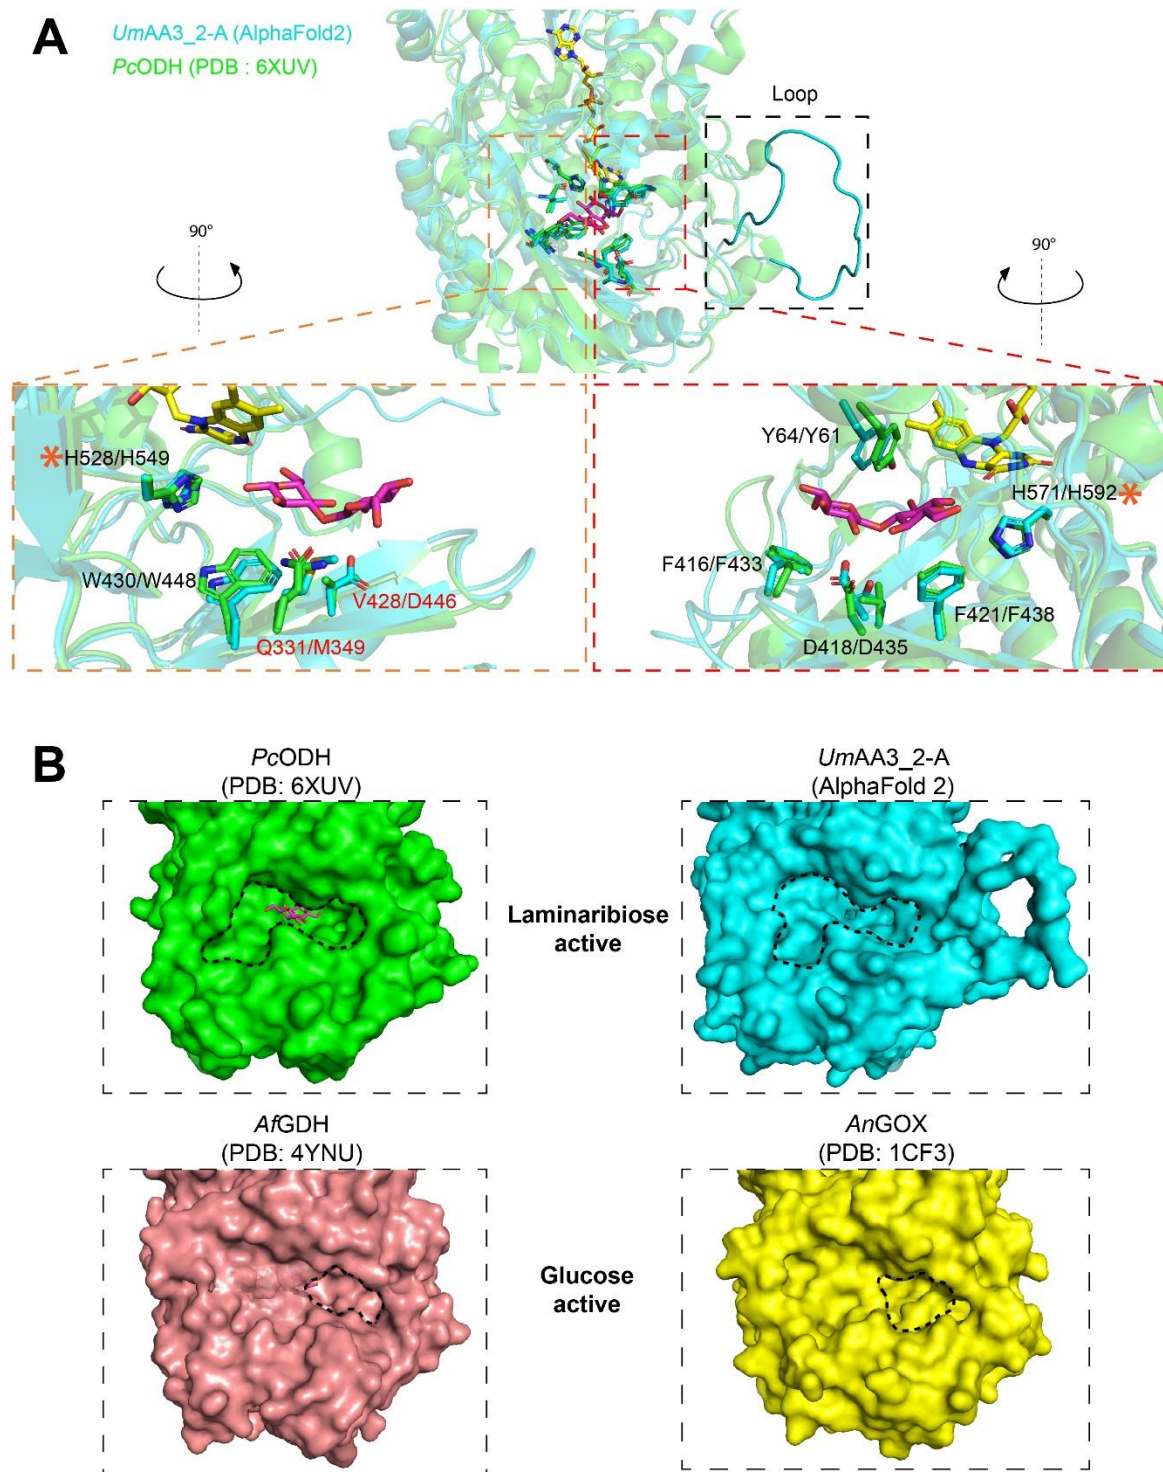

**Fig. S17. Structural comparison of *PcODH* (PDB id 6XUV), and *UmAA3\_2-A* (model).**

**(A)** The structure of *PcODH* (in green) and *UmAA3\_2-A* (in blue) were superimposed in Pymol and shown as cartoon. A global view facing the entrance active site is displayed on top of the figure. The additional loop of *UmAA3\_2-A* is squared in black and the active site of both enzymes are subdivided in two parts: “left side” (squared in orange) and “right side” (squared in red). Zooms on these two parts are shown on the lower part of the figure, where the keys

amino acids for laminaribiose binding in *PcODH* and their structural equivalents in *UmAA3\_2-A* are displayed as stick and annotated according to amino acid numbering in *PcODH/UmAA3\_2-A*. These amino acids are annotated in black when conserved in both proteins or in red when substituted. The two catalytic histidines are labelled with an orange star. The Laminaribiose (colored in purple) and the Flavin adenine dinucleotide (FAD) co-factor (colored in yellow) are shown in sticks. **(B)** Comparison of the active site of laminaribiose active enzymes (*PcODH* and *UmAA3\_2-A*) with glucose active enzymes (*AfGDH* and *AnGOX*). The proteins structures are shown as surface and approximative perimeter of the active site entrance is delimited by a black dotted line.

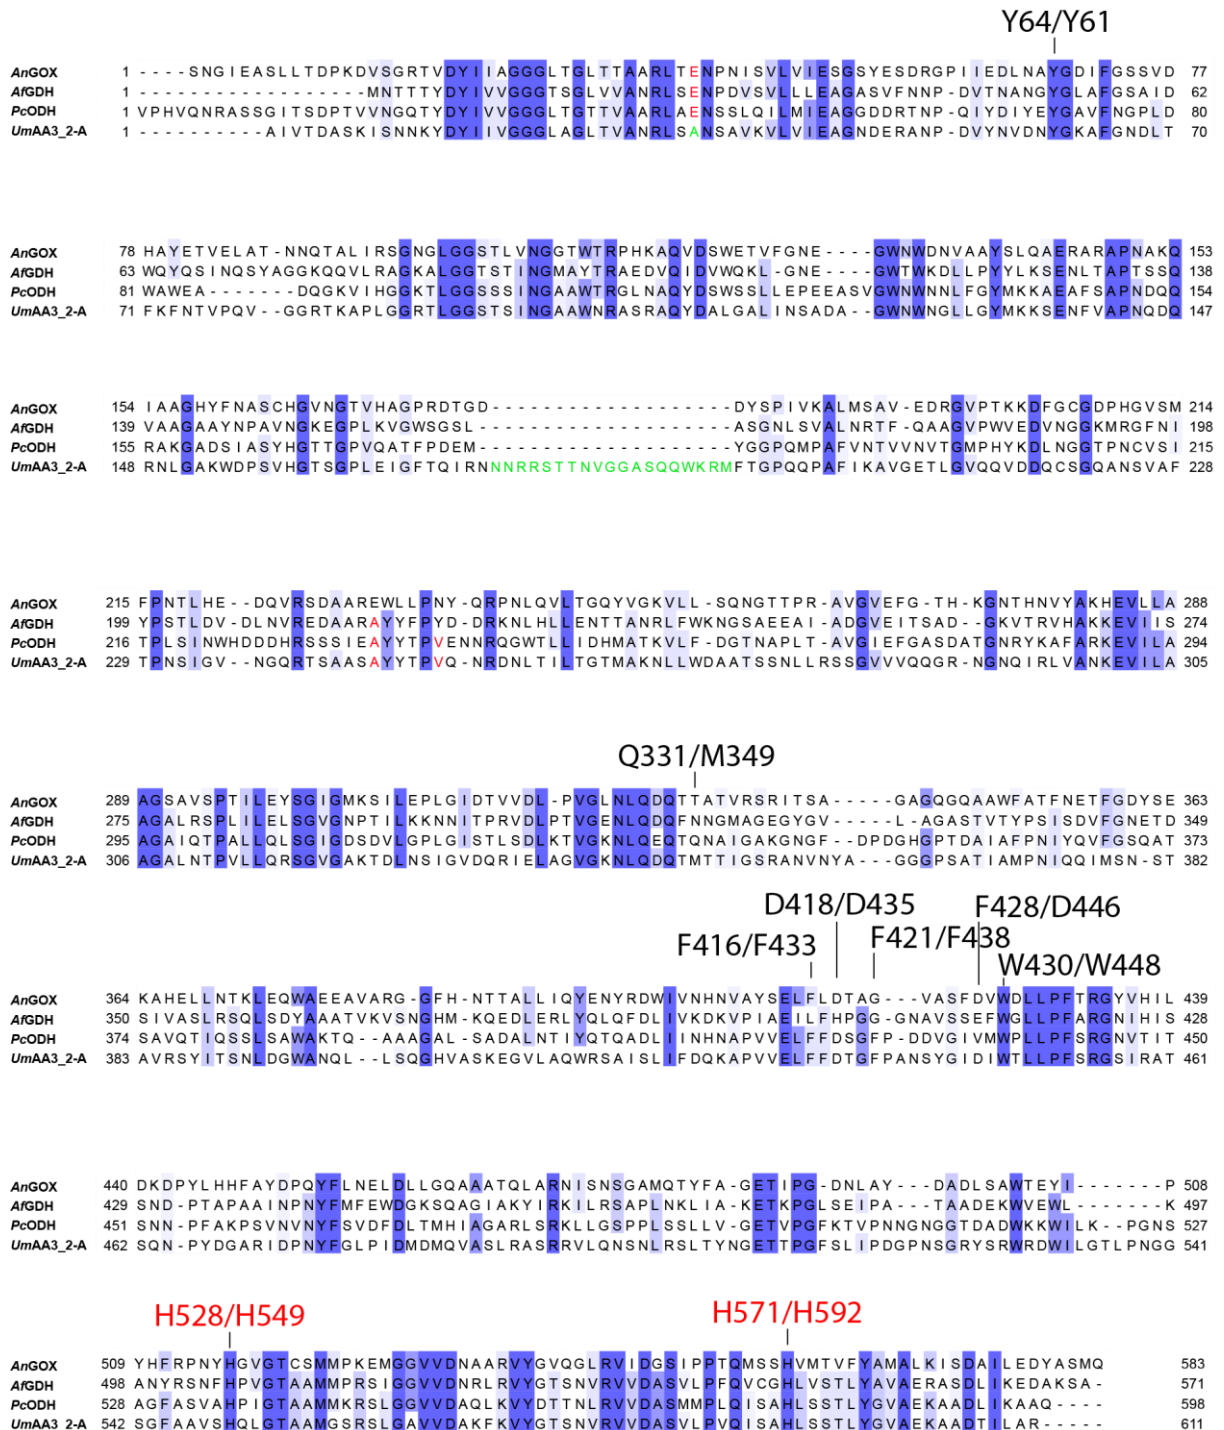

**Fig. S18. Multiple sequence alignment (MSA) of AnGOX, AfGDH, PcODH and UmGH16\_1-A.** The MSA shows the presence of an extra loop in UmAA3\_2-A (printed in green) and key residues involved in substrate binding (annotated according to amino acid numbering in PcODH/UmAA3\_2-A; catalytic histidines are printed in red).

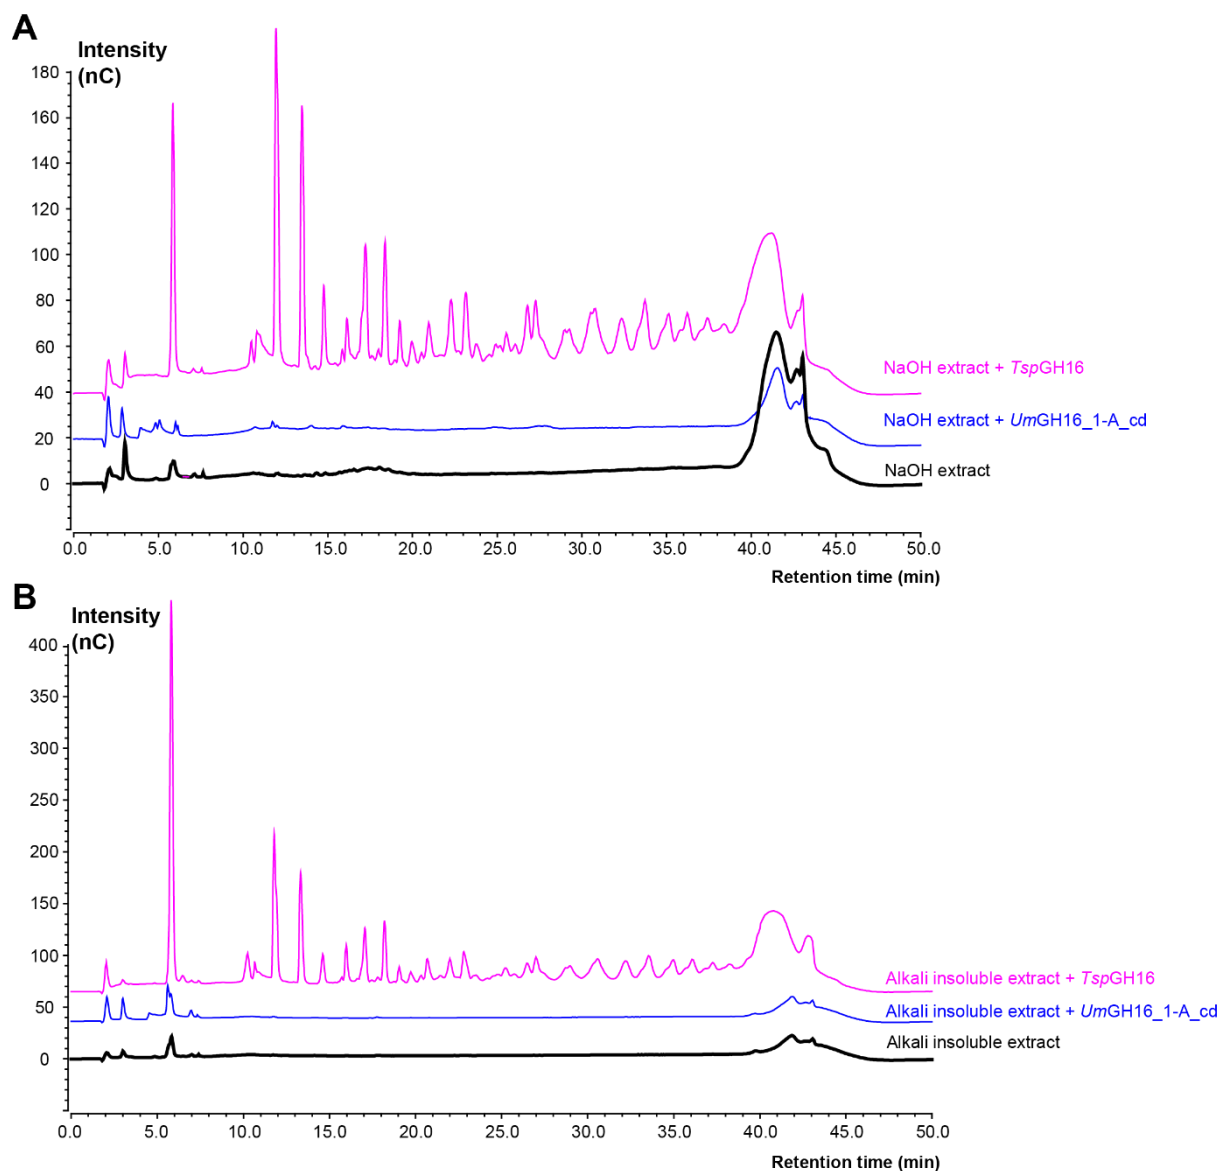

**Fig. S19. Activity of *UmGH16\_1-A\_cd* and *TspGH16\_3* (from Megazyme) on polysaccharides extracts from *U. maydis*.** The graphs show HPAEC-PAD chromatograms of reaction products released from **(A)** NaOH-extracted polysaccharides (5 mg.mL<sup>-1</sup> final concentration), and **(B)** from alkali insoluble material (approx. 1-5 mg.mL<sup>-1</sup>), by the commercial *TspGH16\_3* (100 nM) and *UmGH16\_1-A\_cd* (100 nM). All reactions were incubated during 16 h, in citrate phosphate buffer (50 mM, pH 5.5), in a thermomixer (30 °C, 1,000 rpm). For the sake of clarity, only one chromatogram for each reaction condition is shown (each experiment was carried out at least in triplicate).

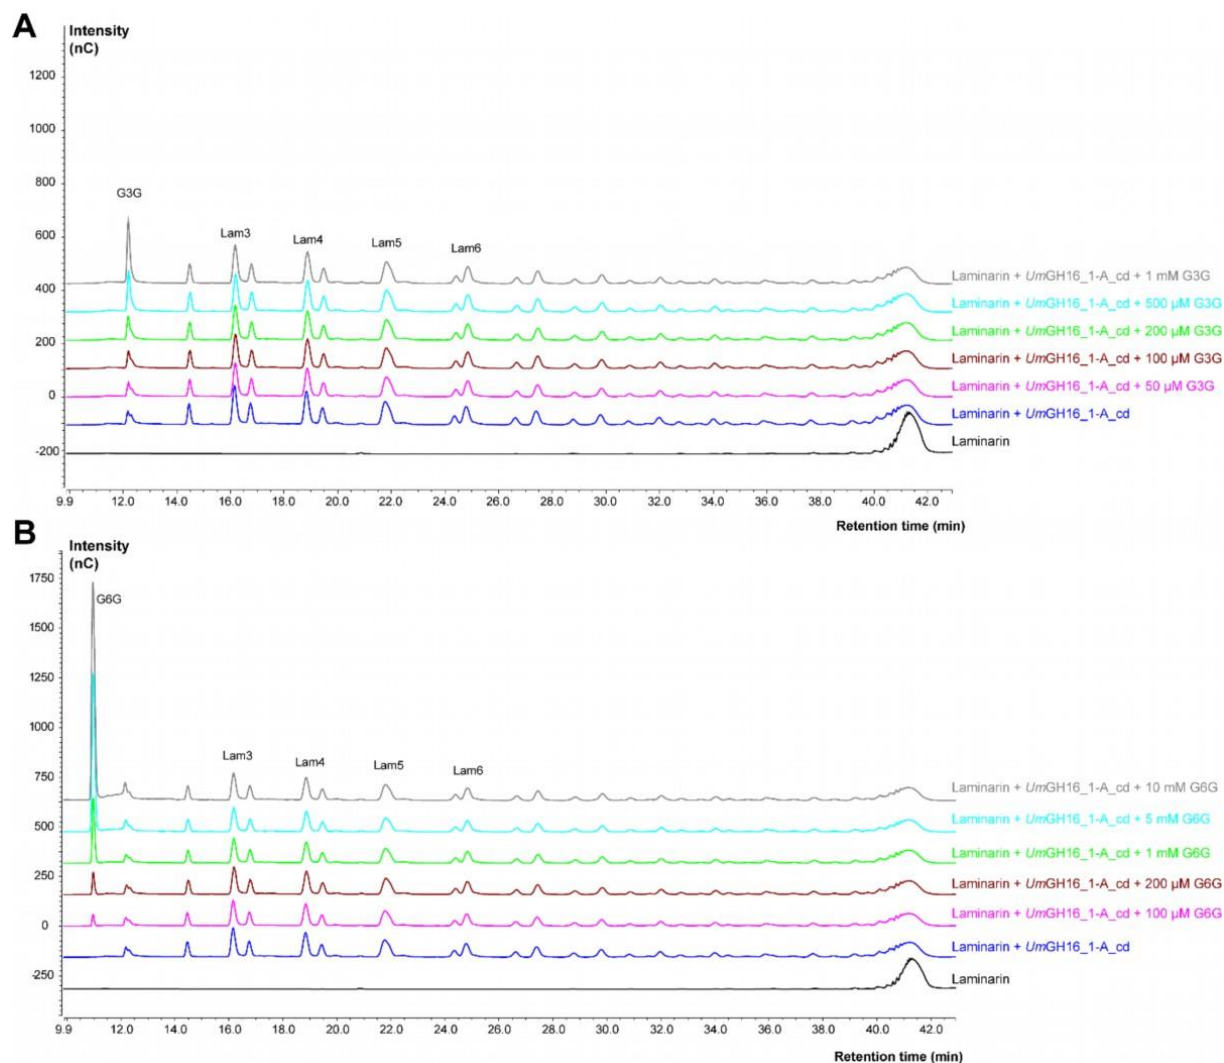

**Fig. S20. *UmGH16\_1-A* is not inhibited by G3G or G6G.** The graphs show HPAEC-PAD chromatograms of reaction products released from laminarin ( $10 \text{ mg}\cdot\text{mL}^{-1}$ ) by *UmGH16\_1-A\_cd* ( $10 \text{ nM}$ ) in the presence of various concentrations of **(A)** G3G ( $0\text{-}1 \text{ mM}$ ) or **(B)** G6G ( $0\text{-}10 \text{ mM}$ ). All reactions were incubated during 4 h, in citrate phosphate buffer ( $50 \text{ mM}$ ,  $\text{pH } 5.5$ ), in a thermomixer ( $30 \text{ }^\circ\text{C}$ ,  $1,000 \text{ rpm}$ ), ( $n = 1$ ). In the negative control reaction, Laminarin in the absence of enzyme was incubated in the same conditions as other reactions. Abbreviations: G3G, laminaribiose (also called Lam2); G6G, gentiobiose; Lam3 to Lam6,  $\beta$ -1,3-glucooligosaccharides of DP3 to 6.

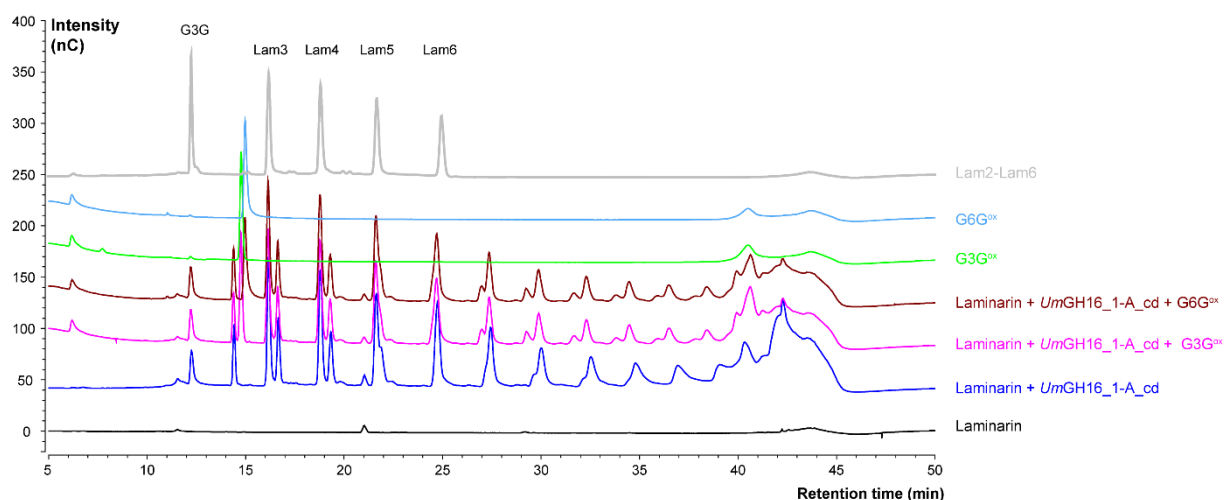

**Fig. S21. *UmGH16\_1-A* is not inhibited by oxidized G3G or G6G.** The graphs show HPAEC-PAD chromatograms of reaction products released from laminarin ( $10 \text{ mg}\cdot\text{mL}^{-1}$ ) by *UmGH16\_1-A\_cd* ( $10 \text{ nM}$ ) in the presence of oxidized G3G ( $\text{G3G}^{\text{ox}}$ ;  $1 \text{ mM}$ ) or oxidized G6G ( $\text{G6G}^{\text{ox}}$ ,  $1 \text{ mM}$ ). All reactions were incubated during 4 h, in citrate phosphate buffer ( $50 \text{ mM}$ ,  $\text{pH } 5.5$ ), in a thermomixer ( $30 \text{ }^{\circ}\text{C}$ ,  $1,000 \text{ rpm}$ ), ( $n = 1$ ). See the experimental section for the preparation of  $\text{G3G}^{\text{ox}}$  and  $\text{G6G}^{\text{ox}}$ . Abbreviations: G3G, laminaribiose (also called Lam2); G6G, gentiobiose; Lam3 to Lam6,  $\beta$ -1,3-glucooligosaccharides of DP3 to 6.



**Table. S1. The 21 CAZymes present in the TOP50 proteins secreted by *U. maydis* after re-analysis in 2022<sup>a</sup>.**

| RANK in TOP 50 <sup>b</sup> | JGI ProtId         | Annotation in 2012 | Re-Annotation in 2022 | Score | Predicted Target (phylogeny-based) <sup>c</sup> | Biochemically characterized? |
|-----------------------------|--------------------|--------------------|-----------------------|-------|-------------------------------------------------|------------------------------|
| 1                           | jgi Ustma2_2 11640 | GH27-CBM35         | GH27-CBM35            | 586   | PCW                                             | NO                           |
| 2                           | jgi Ustma2_2 11831 | GH62               | GH62                  | 556   | PCW                                             | NO                           |
| 3                           | jgi Ustma2_2 10689 | GH10               | GH10                  | 429   | PCW                                             | NO                           |
| 5                           | jgi Ustma2_2 7673  | GH51               | GH51                  | 281   | PCW                                             | NO                           |
| 6                           | jgi Ustma2_2 10518 | CDH_2              | AA3_2                 | 233   | ND                                              | NO                           |
| 7                           | jgi Ustma2_2 11351 | CDH_2              | AA3_2                 | 188   | ND                                              | NO                           |
| 8                           | jgi Ustma2_2 13127 | FAD-Oxidase        | AA7                   | 180   | FCW                                             | NO                           |
| 9                           | jgi Ustma2_2 9924  | CE4                | CE4                   | 119   | FCW                                             | Rizzi et al.                 |
| 11                          | jgi Ustma2_2 13337 | UNK                | GH135                 | 90    | FCW                                             | NO                           |
| 12                          | jgi Ustma2_2 12578 | GH5                | GH5_16                | 88    | PCW                                             | NO                           |
| 16                          | jgi Ustma2_2 7458  | CE4                | CE4                   | 58    | FCW                                             | Rizzi et al.                 |
| 17                          | jgi Ustma2_2 13257 | GH3                | GH3                   | 56    | PCW                                             | NO                           |
| 24                          | jgi Ustma2_2 9413  | GH37               | GH37                  | 32    | PCW                                             | NO                           |
| 27                          | jgi Ustma2_2 9206  | GH26               | GH26                  | 27    | PCW                                             | NO                           |
| 29                          | jgi Ustma2_2 8673  | CE4                | CE4                   | 26    | FCW                                             | Rizzi et al.                 |
| 35                          | jgi Ustma2_2 9331  | GH16               | GH16                  | 22    | FCW ?                                           | This Study                   |
| 37                          | jgi Ustma2_2 8391  | EXPN               | EXPN                  | 20    | PCW                                             | NO                           |
| 40                          | jgi Ustma2_2 9202  | GH45               | GH45                  | 19    | PCW                                             | NO                           |
| 41                          | jgi Ustma2_2 12699 | GH5                | GH5_9                 | 19    | FCW                                             | NO                           |
| 47                          | jgi Ustma2_2 7038  | GH5                | GH5_9                 | 17    | FCW                                             | NO                           |
| 49                          | jgi Ustma2_2 10841 | CDH_2              | AA3_2                 | 16    | FCW ?                                           | This Study                   |

<sup>a</sup> Initial secretomic data (*U. maydis* secretome harvested after 7 days of growth on maize bran) were published by (4).

<sup>b</sup> Only CAZymes are shown in this Table.

<sup>c</sup> Abbreviations: FCW, Fungal Cell Wall ; PCW, Plant Cell Wall ; ND, Not determined; UNK, Unknown.

**Table S2. Kinetic parameters of *UmAA3\_2-A* and *PcODH*<sup>a,b</sup>**

|                                 | <i>Ustilago maydis</i>               |                                                      |                                                      |                                 |                                                              |                                                      |                                                      |                                 | <i>Pycnoporus cinnabarinus</i>              |                                                      |                                                      |             |
|---------------------------------|--------------------------------------|------------------------------------------------------|------------------------------------------------------|---------------------------------|--------------------------------------------------------------|------------------------------------------------------|------------------------------------------------------|---------------------------------|---------------------------------------------|------------------------------------------------------|------------------------------------------------------|-------------|
|                                 | <b><i>UmAA3_2-A</i> (This Study)</b> |                                                      |                                                      |                                 | <b><i>UmGDHIII</i> (Wijayanti et al. (2021))<sup>c</sup></b> |                                                      |                                                      |                                 | <b><i>PcODH</i> (Cerruti et al. (2021))</b> |                                                      |                                                      |             |
|                                 | M-M model                            |                                                      | initial slope                                        |                                 | M-M model                                                    |                                                      | initial slope                                        |                                 | M-M model                                   |                                                      | initial slope                                        |             |
| $k_{cat}$<br>(s <sup>-1</sup> ) | $K_M$<br>(mM)                        | $k_{cat}/K_M$<br>(s <sup>-1</sup> .M <sup>-1</sup> ) | $k_{cat}/K_M$<br>(s <sup>-1</sup> .M <sup>-1</sup> ) | $k_{cat}$<br>(s <sup>-1</sup> ) | $K_M$<br>(mM)                                                | $k_{cat}/K_M$<br>(s <sup>-1</sup> .M <sup>-1</sup> ) | $k_{cat}/K_M$<br>(s <sup>-1</sup> .M <sup>-1</sup> ) | $k_{cat}$<br>(s <sup>-1</sup> ) | $K_M$<br>(mM)                               | $k_{cat}/K_M$<br>(s <sup>-1</sup> .M <sup>-1</sup> ) | $k_{cat}/K_M$<br>(s <sup>-1</sup> .M <sup>-1</sup> ) |             |
| Glc                             | 9.2<br>± 0.6                         | 454<br>± 52                                          | 20.2<br>± 3.7                                        | 18.0<br>± 2                     | 0.2<br>±0.009                                                | 12.5<br>±0.4                                         | 18.4                                                 | -<br>-                          | 50<br>± 3                                   | 755<br>±110                                          | 67<br>± 10                                           | 47<br>± 1   |
| G3G                             | 21.5<br>± 1.4                        | 36<br>± 4                                            | 600.00<br>± 105                                      | 636.00<br>± 76                  | 1.0<br>±0.21                                                 | 250<br>±20                                           | 4.0                                                  | -<br>-                          | 71<br>± 4                                   | 77<br>± 10                                           | 917<br>± 129                                         | 777<br>± 21 |
| G6G                             | 48.2<br>± 4.5                        | 86<br>± 12                                           | 560<br>± 130                                         | 697.00<br>± 68                  | 6.3<br>±0.3                                                  | 51<br>±4                                             | 122.3                                                | -<br>-                          | -<br>-                                      | -<br>-                                               | -<br>-                                               | -<br>-      |

<sup>a</sup>Kinetic parameters were calculated via non-linear regression fitting to the Michaelis-Menten equation. Catalytic efficiencies ( $k_{cat}/K_M$ ) were also calculated by measurement of the slope of the linear phase (low [S] <<  $K_M$ ) of the Michaelis-Menten plot.

<sup>b</sup>*UmAA3\_2-A* and *UmGDHIII* are the same enzymes. *PcODH* was previously known as *PcGDH*.

<sup>c</sup>Wijayanti et al. used benzoquinone as electron acceptor, when dichlorophenolindophenol (DCIP) was used in the present study and by Cerruti et al.

## 2. Full abbreviations list

### **Enzymes/Microorganisms**

AA: Auxiliary activities  
AR: AmplexRed®  
CE: Carbohydrate Esterases  
GH: Glycoside hydrolases  
HRP: Horseradish peroxidase  
*Um* : *Ustilago maydis*  
*Tsp* : *Trichoderma spp.*

### **Substrates/products**

DCIP: 2,6-Dichlorophenolindophenol  
DMSO: dimethyl sulfoxide  
G3G: Laminaribiose  
G6G: Gentiobiose  
FCW: Fungal cell wall  
PCW: Plant cell wall  
YPD: Yeast Extract–Peptone–Dextrose

### **Methods**

HPAEC-PAD: high-performance anion-exchange chromatography coupled with pulsed amperometric detection  
UPLC-MS: Ultra-performance liquid chromatography- mass spectrometry  
UPLC-ESI-MS: Ultra-performance liquid chromatography coupled to electrospray ionization and mass spectrometry  
UHPLC-ESI-IT: Ultra High-Performance Liquid Chromatography -Electrospray -Ion trap  
LC-MS: Liquid chromatography–mass spectrometry  
MALDI-ToF: Matrix-assisted laser desorption/ionization-Time-of-flight  
GC-MS: Gas chromatography–mass spectrometry  
SEC: Size-exclusion chromatography  
MSA: Multiple sequences alignment  
MW: Molecular weight  
SDS-PAGE: Sodium Dodecyl Sulfate–Polyacrylamide Gel Electrophoresis

### 3. Supplementary references list

1. Lanver D, Müller AN, Happel P, Schweizer G, Haas FB, Franitza M, Pellegrin C, Reissmann S, Altmüller J, Rensing SA, Kahmann R. 2018. The biotrophic development of *Ustilago maydis* studied by RNA-seq analysis. *Plant Cell* 30:300–323.
2. Vasur J, Kawai R, Andersson E, Igarashi K, Sandgren M, Samejima M, Ståhlberg J. 2009. X-ray crystal structures of *Phanerochaete chrysosporium* Laminarinase 16A in complex with products from lichenin and laminarin hydrolysis. *FEBS J* 276:3858–3869.
3. Song J, Tan H, Perry AJ, Akutsu T, Webb GI. 2012. PROSPER: An Integrated Feature-Based Tool for Predicting Protease Substrate Cleavage Sites. *PLoS One* 7:50300.
4. Couturier M, Navarro D, Olivé C, Chevret D, Haon M, Favel A, Lesage-Meessen L, Henrissat B, Coutinho PM, Berrin JG. 2012. Post-genomic analyses of fungal lignocellulosic biomass degradation reveal the unexpected potential of the plant pathogen *Ustilago maydis*. *BMC Genomics* 13:57.
